# Supplementary material for: Acaricidal and insecticidal activities of entomopathogenic nematodes combined with rosemary essential oil and bacterium-synthesized silver nanoparticles against camel tick, Hyalomma dromedarii and wax moth, Galleria mellonella
Source: PeerJ. 2025 Jan 14;13:e18782. doi: 10.7717/peerj.18782 (PMC11740739; doi:10.7717/peerj.18782)
Supplement: Supplemental Information 1 [file peerj-13-18782-s001.xlsx]

## Sheet: Sheet1
									Particle Size (nm)	Counts
										0
									5	4
									10	10
									15	20
									20	25
									25	45
									30	18
									35	13
									40	7
									45	2
