# Supplementary material for: Acaricidal and insecticidal activities of entomopathogenic nematodes combined with rosemary essential oil and bacterium-synthesized silver nanoparticles against camel tick, Hyalomma dromedarii and wax moth, Galleria mellonella
Source: PeerJ. 2025 Jan 14;13:e18782. doi: 10.7717/peerj.18782 (PMC11740739; doi:10.7717/peerj.18782)
Supplement: Supplemental Information 2 [file peerj-13-18782-s002.xlsx]

## Sheet: Final
Treatments	IW (mg)	POP (days)	OP (days)	EPI	NEI	EW (mg)	H (%)	SP (days)	IO %	RW (mg)	EPI control	REI	REI control	CP%
SS	190	3	5	0.526316	54.9451	100	30	7	24.812	8	0.7	315789	1.10497e+06	71.4211
SS	190	3	4	0.536842	56.044	102	28	7	32.8947	8	0.8	300632	1.15105e+06	73.882
SS	189	3	5	0.592593	61.8785	112	31	7	34.1564	8	0.9	367407	1.37445e+06	73.2688
SS	200	3	5	0.55	57.2917	110	27	8	28.3871	8	0.768018	297000	1.53604e+06	80.6645
SS	200	3	4	0.545	57.0681	109	30	8	22.1429	9	0.7	327000	1.24335e+06	73.7002
SS	200	2	4	0.605	63.3508	121	29	7	38.8889	9	0.99	350900	1.20921e+06	70.9811
SS	220	2	5	0.609091	63.5071	134	28	6	37.8479	9	0.98	341091	1.24706e+06	72.6484
SS	210	2	5	0.47619	49.7512	100	31	6	51.4091	9	0.98	295238	1.45303e+06	79.6811
SS	220	3	5	0.490909	51.1848	108	26	7	50.4132	9	0.99	255273	1485000	82.8099
SS	220	2	5	0.5	52.381	110	30	7	44.4444	10	0.9	300000	1.6803e+06	82.146
SS	221	3	5	0.502262	52.6066	111	29	7	26.6697	10	0.684932	291312	1.36986e+06	78.7342
SS	210	2	4	0.533333	56	112	27	8	27.9233	10	0.739953	288000	1.43551e+06	79.9374
SS	195	2	6	0.502564	52.973	98	28	8	21.3983	10	0.639381	281436	1.27876e+06	77.9915
SS	222	3	5	0.477477	50.237	106	29	7	32.7823	11	0.710345	276937	1.39228e+06	80.109
SS	219	3	6	0.456621	48.3092	100	31	8	39.5087	12	0.754854	283105	1.47951e+06	80.865
HI	90	2	2	0.377778	40.9639	34	17	5	58.0247	7	0.9	128444	1200000	89.2963
HI	93	1	3	0.387097	42.3529	36	18	5	51.6129	8	0.8	139355	1.35446e+06	89.7114
HI	98	1	4	0.336735	37.0787	33	20	6	65.9864	9	0.99	134694	1.53333e+06	91.2156
HI	100	2	3	0.35	38.4615	35	25	5	60.6742	9	0.89	175000	1320000	86.7424
HI	96	2	3	0.333333	35.9551	32	19	6	61.6858	7	0.87	126667	1.11864e+06	88.6768
HI	100	2	2	0.38	41.7582	38	22	6	50.6494	9	0.77	167200	1.4813e+06	88.7126
HI	105	2	4	0.304762	32.6531	32	21	6	61.9048	7	0.8	128000	1605000	92.0249
HI	108	2	3	0.305556	33	33	20	6	59.1613	8	0.748201	122222	1.4964e+06	91.8323
HI	110	2	3	0.354545	38.6139	39	22	6	59.2476	9	0.87	156000	1.14397e+06	86.3633
HI	121	2	3	0.280992	30.0885	34	23	5	51.8837	8	0.583984	129256	1.16797e+06	88.9332
EO	222	3	5	0.54955	57.277	122	30	8	23.9875	9	0.722973	329730	1.41703e+06	76.7309
EO	243	3	5	0.45679	47.4359	111	35	8	33.0138	9	0.681917	319753	1.32292e+06	75.8297
EO	250	3	5	0.528	54.7718	132	40	8	32.6242	9	0.783664	422400	1.53598e+06	72.4997
EO	267	3	5	0.524345	54.2636	140	42	8	19.1011	9	0.648148	440449	1.2963e+06	66.0225
EO	265	3	6	0.54717	56.6406	145	43	8	27.8672	9	0.758559	470566	1.51712e+06	68.9829
EO	275	3	6	0.52	53.7594	143	34	9	29.41	9	0.736648	353600	1.4733e+06	75.9994
EO	290	3	5	0.496552	51.4286	144	33	8	39.8851	10	0.826004	327724	1.65201e+06	80.1621
EO	287	3	5	0.574913	59.5668	165	31	8	26.5821	10	0.783069	356446	1.56614e+06	77.2404
EO	276	3	5	0.565217	58.6466	156	41	7	31.8337	10	0.829175	463478	1.65835e+06	72.0518
EO	216	3	5	0.574074	60.1942	124	40	8	26.4377	10	0.780392	459259	1.56078e+06	70.5751
EO	229	3	5	0.655022	68.4932	150	45	9	27.2198	10	0.9	589520	1.26885e+06	53.5391
EO	244	3	5	0.618852	64.5299	151	46	8	22.6434	10	0.8	569344	1.33333e+06	57.2992
EO	266	4	6	0.571429	59.375	152	39	8	18.3673	10	0.7	445714	1.30719e+06	65.9029
EO	298	3	5	0.442953	45.993	132	43	7	32.3628	11	0.654896	380940	1.30979e+06	70.916
EO	299	3	6	0.434783	45.2962	130	39	8	43.6216	12	0.771186	339130	1.54237e+06	78.0124
EO	265	3	5	0.501887	52.1569	133	40	8	39.126	10	0.824468	401509	1.64894e+06	75.6504
EO	233	3	5	0.575107	60.0897	134	43	8	31.5895	10	0.840671	494592	1.68134e+06	70.5835
EO	243	3	5	0.555556	58.1897	135	43	8	21.5762	11	0.708402	477778	1.4168e+06	66.2778
EO	221	3	5	0.665158	70	147	42	8	20.8145	11	0.84	558733	1680000	66.7421
EO	270	4	5	0.533333	55.3846	144	41	9	36.3278	10	0.837624	437333	1.67525e+06	73.8944
AgNPS	300	4	6	0.59	61.0345	177	45	9	26.4203	10	0.801852	531000	1.6037e+06	66.8891
AgNPS	324	4	6	0.549383	56.6879	178	44	9	33.4448	10	0.825455	483457	1.65091e+06	70.7157
AgNPS	345	4	6	0.478261	49.2537	165	50	9	43.939	10	0.853107	478261	1.70621e+06	71.9695
AgNPS	323	4	6	0.513932	53.2051	166	54	10	42.4175	11	0.892514	555046	1.78503e+06	68.9055
AgNPS	346	4	6	0.491329	50.7463	170	56	10	39.6401	11	0.814	550289	1628000	66.1985
AgNPS	312	4	6	0.544872	56.4784	170	55	9	32.6478	11	0.808989	599359	1.61798e+06	62.9563
AgNPS	310	4	6	0.551613	57.3826	171	53	10	32.9719	12	0.822957	584710	1.64591e+06	64.4751
AgNPS	320	4	6	0.540625	55.9871	173	60	9	32.6521	11	0.802734	648750	1.60547e+06	59.5912
AgNPS	376	4	7	0.478723	49.3151	180	61	8	37.2469	11	0.762868	584043	1.52574e+06	61.7206
AgNPS	356	4	7	0.52809	54.6512	188	50	8	32.5365	12	0.782779	528090	1.56556e+06	66.2683
AgNPS	343	4	6	0.553936	57.4018	190	55	9	34.8612	12	0.850394	609329	1.70079e+06	64.1737
AgNPS	322	4	7	0.546584	56.9579	176	55	10	21.9166	13	0.7	601242	1.10497e+06	45.5876
AgNPS	333	4	6	0.525526	54.5171	175	54	10	24.9249	12	0.7	567568	1.15105e+06	50.6914
AgNPS	387	4	5	0.496124	51.0638	192	51	9	27.8076	11	0.687225	506047	1.37445e+06	63.1819
AgNPS	376	4	6	0.5	51.6484	188	53	8	34.8974	12	0.768018	530000	1.53604e+06	65.4956
AgNPS	356	3	6	0.525281	54.0462	187	49	9	15.5058	10	0.621677	514775	1.24335e+06	58.5978
AgNPS	330	4	6	0.506061	52.1875	167	48	9	16.2992	10	0.604607	485818	1.20921e+06	59.8236
AgNPS	340	5	6	0.485294	50.152	165	50	9	22.1698	11	0.623529	485294	1.24706e+06	61.0849
AgNPS	350	3	7	0.442857	45.7227	155	50	9	26.1905	11	0.6	442857	1.45303e+06	69.5217
AgNPS	354	4	6	0.508475	52.3256	180	56	9	15.2542	10	0.6	569492	1485000	61.6504
AgNPS	355	4	6	0.515493	53.3528	183	58	10	26.3581	12	0.7	597972	1.6803e+06	64.4127
AgNPS	332	4	6	0.493976	51.25	164	57	9	27.8795	12	0.684932	563133	1.36986e+06	58.8913
AgNPS	390	4	6	0.44359	45.8886	173	54	9	26.0684	13	0.6	479077	1.43551e+06	66.6267
AgNPS	341	4	6	0.519062	53.7994	177	53	9	18.818	12	0.639381	550205	1.27876e+06	56.9736
HI+EO	64	1	2	0.265625	28.8136	17	12	4	73.1692	5	0.99	63750	1.39228e+06	95.4212
HI+EO	55	1	2	0.272727	30	15	13	4	72.4518	5	0.99	70909.1	1.47951e+06	95.2073
HI+EO	60	1	2	0.266667	29.0909	16	10	4	73.064	5	0.99	53333.3	1200000	95.5556
HI+EO	66	1	2	0.257576	27.4194	17	12	4	73.7168	4	0.98	61818.2	1.35446e+06	95.4359
HI+EO	65	1	2	0.246154	26.2295	16	11	4	74.6233	4	0.97	54153.8	1.53333e+06	96.4682
HI+EO	58	1	2	0.275862	30.1887	16	11	4	72.1351	5	0.99	60689.7	1320000	95.4023
SS+EO	90	1	2	0.333333	36.1446	30	21	5	41	7	0.564972	140000	1.11864e+06	87.4848
SS+EO	93	1	3	0.322581	35.2941	30	20	5	56.8817	8	0.74813	129032	1.4813e+06	91.2892
SS+EO	88	1	3	0.352273	38.2716	31	17	5	56.1031	7	0.8025	119773	1605000	92.5375
SS+EO	78	1	3	0.371795	40.8451	29	18	5	50.3082	7	0.748201	133846	1.4964e+06	91.0555
SS+EO	96	1	3	0.302083	32.5843	29	19	5	47.1868	7	0.571984	114792	1.14397e+06	89.9655
SS+EO	84	2	2	0.333333	36.3636	28	17	5	42.9208	7	0.583984	113333	1.16797e+06	90.2965
SS+EO	98	2	3	0.285714	30.7692	28	18	4	56.71	7	0.66	102857	1.41703e+06	92.7413
SS+EO	87	2	3	0.344828	37.5	30	20	4	49.4326	7	0.681917	137931	1.32292e+06	89.5737
HI+AgNPS	90	1	2	0.322222	34.9398	29	17	4	58.8826	7	0.783664	109556	1.53598e+06	92.8674
HI+AgNPS	87	1	3	0.333333	36.25	29	17	4	57.8059	7	0.79	113333	1.2963e+06	91.2571
HI+AgNPS	88	1	3	0.340909	37.037	30	18	4	55.0583	7	0.758559	122727	1.51712e+06	91.9105
HI+AgNPS	78	1	3	0.358974	38.8889	28	16	5	51.2692	6	0.736648	114872	1.4733e+06	92.2031
HI+AgNPS	88	1	2	0.329545	35.3659	29	19	4	60.1036	6	0.826004	125227	1.65201e+06	92.4197
HI+AgNPS	84	1	2	0.321429	34.6154	27	18	4	58.9527	6	0.783069	115714	1.56614e+06	92.6115
HI+AgNPS	90	2	2	0.311111	33.7349	28	17	4	62.4794	7	0.829175	105778	1.65835e+06	93.6215
HI+AgNPS	87	2	2	0.310345	33.3333	27	16	4	60.2322	6	0.780392	99310.3	1.56078e+06	93.6372
SS+AgNPS	100	2	2	0.3	32.6087	30	17	5	52.7132	8	0.634426	102000	1.26885e+06	91.9612
SS+AgNPS	100	2	3	0.32	34.7826	32	18	5	52	8	0.666667	115200	1.33333e+06	91.36
SS+AgNPS	102	2	4	0.323529	35.1064	33	20	6	50.5	8	0.653595	129412	1.30719e+06	90.1
SS+AgNPS	100	2	4	0.35	38.0435	35	20	6	46.5564	8	0.654896	140000	1.30979e+06	89.3113
SS+AgNPS	106	2	4	0.301887	32.6531	32	19	6	60.8542	8	0.771186	114717	1.54237e+06	92.5623
SS+AgNPS	100	2	3	0.31	33.6957	31	20	5	62.4	8	0.824468	124000	1.64894e+06	92.48
SS+AgNPS	105	2	4	0.304762	32.9897	32	21	6	63.7478	8	0.840671	128000	1.68134e+06	92.387
SS+AgNPS	108	2	3	0.305556	33	33	20	5	56.8669	8	0.708402	122222	1.4168e+06	91.3734
SS+AgNPS	110	2	3	0.272727	29.4118	30	19	5	67.5325	8	0.84	103636	1680000	93.8312
SS+AgNPS	121	2	3	0.264463	28.3186	32	19	5	68.427	8	0.837624	100496	1.67525e+06	94.0011
Tween	543	4	14	0.552486	60.241	300	100	20	0	45		1.10497e+06
Tween	523	5	14	0.575526	62.578	301	100	19	0	42		1.15105e+06
Tween	454	4	14	0.687225	75	312	100	19	0	38		1.37445e+06
Tween	444	4	14	0.768018	83.5784	341	100	20	0	36		1.53604e+06
Tween	489	4	13	0.621677	67.5556	304	100	17	0	39		1.24335e+06
Tween	521	5	13	0.604607	65.4886	315	100	20	0	40		1.20921e+06
Tween	510	5	14	0.623529	67.8038	318	100	17	0	41		1.24706e+06
Tween	433	4	14	0.741339	80.4511	321	98	16	0	34		1.45303e+06
Tween	400	4	13	0.75	84.2697	300	99	18	0	44		1485000
Tween	403	4	13	0.848635	95.5307	342	99	18	0	45		1.6803e+06
Tween	511	5	13	0.684932	75.9219	350	100	16	0	50		1.36986e+06
Tween	423	4	13	0.739953	80.2564	313	97	16	0	33		1.43551e+06
Tween	452	4	13	0.639381	68.9737	289	100	20	0	33		1.27876e+06
Tween	435	5	13	0.710345	77.6382	309	98	20	0	37		1.39228e+06
Tween	412	4	14	0.754854	82.9333	311	98	19	0	37		1.47951e+06
Tween	500	4	14	0.6	65.5022	300	100	20	0	42		1200000
Tween	505	5	14	0.677228	73.5484	342	100	17	0	40		1.35446e+06
Tween	420	4	14	0.766667	84.9604	322	100	18	0	41		1.53333e+06
Tween	465	4	14	0.666667	72.77	310	99	17	0	39		1320000
Tween	531	5	15	0.564972	60.7287	300	99	20	0	37		1.11864e+06
Tween	401	5	15	0.74813	81.0811	300	99	19	0	31		1.4813e+06
Tween	400	4	13	0.8025	86.9919	321	100	17	0	31		1605000
Tween	417	3	13	0.748201	81.4621	312	100	18	0	34		1.4964e+06
Tween	514	5	13	0.571984	60.7438	294	100	16	0	30		1.14397e+06
Tween	512	5	15	0.583984	63.8889	299	100	18	0	44		1.16797e+06
Tween	444	5	15	0.722973	80.4511	321	98	19	0	45		1.41703e+06
Tween	459	5	13	0.681917	75.9709	313	97	18	0	47		1.32292e+06
Tween	453	5	14	0.783664	86.5854	355	98	20	0	43		1.53598e+06
DW	540	4	14	0.648148	72.0165	350	100	20	0	54		1.2963e+06
DW	555	4	14	0.758559	84.2	421	100	20	0	55		1.51712e+06
DW	543	4	14	0.736648	81.9672	400	100	20	0	55		1.4733e+06
DW	523	5	14	0.826004	92.7039	432	100	19	0	57		1.65201e+06
DW	567	4	13	0.783069	86.8885	444	100	19	0	56		1.56614e+06
DW	521	5	15	0.829175	91.7197	432	100	20	0	50		1.65835e+06
DW	510	5	14	0.780392	87.2807	398	100	20	0	54		1.56078e+06
DW	610	4	14	0.634426	69.4794	387	100	20	0	53		1.26885e+06
DW	600	4	15	0.666667	74.0741	400	100	19	0	60		1.33333e+06
DW	612	4	15	0.653595	72.9927	400	100	18	0	64		1.30719e+06
DW	623	4	15	0.654896	72.8571	408	100	19	0	63		1.30979e+06
DW	590	4	14	0.771186	86.0113	455	100	18	0	61		1.54237e+06
DW	564	4	15	0.824468	92.2619	465	100	19	0	60		1.64894e+06
DW	477	5	14	0.840671	97.5669	401	100	19	0	66		1.68134e+06
DW	607	4	14	0.708402	79.1897	430	100	20	0	64		1.4168e+06
DW	500	4	14	0.84	96.1098	420	100	20	0	63		1680000
DW	505	5	14	0.837624	94.2094	423	100	19	0	56		1.67525e+06
DW	540	4	14	0.801852	89.834	433	100	20	0	58		1.6037e+06
DW	550	4	14	0.825455	90.982	454	100	18	0	51		1.65091e+06
DW	531	5	15	0.853107	94.9686	453	100	18	0	54		1.70621e+06
DW	521	5	15	0.892514	99.5717	465	100	17	0	54		1.78503e+06
DW	500	4	14	0.814	90.4444	407	100	20	0	50		1628000
DW	534	3	14	0.808989	89.2562	432	100	19	0	50		1.61798e+06
DW	514	5	15	0.822957	91.3607	423	100	19	0	51		1.64591e+06
DW	512	5	15	0.802734	89.154	411	100	18	0	51		1.60547e+06
DW	544	5	15	0.762868	84.6939	415	100	18	0	54		1.52574e+06
DW	511	5	15	0.782779	87.3362	400	100	18	0	53		1.56556e+06
DW	508	5	14	0.850394	94.7368	432	100	19	0	52		1.70079e+06
