# Supplementary material for: Acaricidal and insecticidal activities of entomopathogenic nematodes combined with rosemary essential oil and bacterium-synthesized silver nanoparticles against camel tick, Hyalomma dromedarii and wax moth, Galleria mellonella
Source: PeerJ. 2025 Jan 14;13:e18782. doi: 10.7717/peerj.18782 (PMC11740739; doi:10.7717/peerj.18782)
Supplement: Supplemental Information 3 [file peerj-13-18782-s003.xlsx]

## Sheet: HI
Treatments	Conc.	R	24 h-Dead	24 M%		48 h-Dead	48 M%		72 h-Dead	72 M%		96 h-Dead	96 M%
EO	60	1	2	2		2	2		2	2		3	3
EO	60	2	2	2		2	2		3	3		3	3
EO	60	3	1	1		2	2		3	3		4	4
EO	60	4	1	1		1	1		2	2		3	3
EO	60	5	1	1		1	1		2	2		3	3
EO	40	1	1	1		1	1		2	2		3	3
EO	40	2	1	1		1	1		2	2		3	3
EO	40	3	1	1		1	1		2	2		2	2
EO	40	4	0	0		1	1		2	2		2	2
EO	40	5	0	0		1	1		2	2		2	2
EO	20	1	0	0		0	0		1	1		1	1
EO	20	2	0	0		0	0		1	1		1	1
EO	20	3	0	0		0	0		1	1		1	1
EO	20	4	0	0		0	0		1	1		1	1
EO	20	5	0	0		0	0		1	1		2	2
EO	10	1	0	0		0	0		0	0		0	0
EO	10	2	0	0		0	0		0	0		0	0
EO	10	3	0	0		0	0		0	0		0	0
EO	10	4	0	0		0	0		0	0		0	0
EO	10	5	0	0		0	0		0	0		0	0
Treatments	Conc.	R	24 h-Dead	24 M%		48 h-Dead	48 M%		72 h-Dead	72 M%		96 h-Dead	96 M%
AgNPs	4	1	3	3		3	3		3	3		4	4
AgNPs	4	2	3	3		3	3		4	4		4	4
AgNPs	4	3	3	3		4	4		4	4		4	4
AgNPs	4	4	3	3		4	4		4	4		4	4
AgNPs	4	5	3	3		4	4		4	4		4	4
AgNPs	2	1	2	2		2	2		2	2		3	3
AgNPs	2	2	2	2		3	3		3	3		3	3
AgNPs	2	3	2	2		3	3		3	3		3	3
AgNPs	2	4	1	1		2	2		3	3		4	4
AgNPs	2	5	2	2		2	2		3	3		3	3
AgNPs	1	1	1	1		2	2		3	3		3	3
AgNPs	1	2	1	1		2	2		3	3		3	3
AgNPs	1	3	1	1		1	1		2	2		3	3
AgNPs	1	4	0	0		1	1		1	1		2	2
AgNPs	1	5	0	0		1	1		1	1		2	2
AgNPs	0.5	1	0	0		0	0		0	0		0	0
AgNPs	0.5	2	0	0		0	0		0	0		0	0
AgNPs	0.5	3	0	0		0	0		0	0		0	0
AgNPs	0.5	4	0	0		0	0		0	0		0	0
AgNPs	0.5	5	0	0		0	0		0	0		0	0
Tween	60	1	0	0		0	0		0	0		0	0
Tween	60	2	0	0		0	0		0	0		0	0
Tween	60	3	0	0		0	0		0	0		0	0
Tween	60	4	0	0		0	0		0	0		0	0
Tween	60	5	0	0		0	0		0	0		0	0
Tween	40	1	0	0		0	0		0	0		0	0
Tween	40	2	0	0		0	0		0	0		0	0
Tween	40	3	0	0		0	0		0	0		0	0
Tween	40	4	0	0		0	0		0	0		0	0
Tween	40	5	0	0		0	0		0	0		0	0
Tween	20	1	0	0		0	0		0	0		0	0
Tween	20	2	0	0		0	0		0	0		0	0
Tween	20	3	0	0		0	0		0	0		0	0
Tween	20	4	0	0		0	0		0	0		0	0
Tween	20	5	0	0		0	0		0	0		0	0
Tween	10	1	0	0		0	0		0	0		0	0
Tween	10	2	0	0		0	0		0	0		0	0
Tween	10	3	0	0		0	0		0	0		0	0
Tween	10	4	0	0		0	0		0	0		0	0
Tween	10	5	0	0		0	0		0	0		0	0
DW	4	1	0	0		0	0		0	0		0	0
DW	4	2	0	0		0	0		0	0		0	0
DW	4	3	0	0		0	0		0	0		0	0
DW	4	4	0	0		0	0		0	0		0	0
DW	4	5	0	0		0	0		0	0		0	0
DW	2	1	0	0		0	0		0	0		0	0
DW	2	2	0	0		0	0		0	0		0	0
DW	2	3	0	0		0	0		0	0		0	0
DW	2	4	0	0		0	0		0	0		0	0
DW	2	5	0	0		0	0		0	0		0	0
DW	1	1	0	0		0	0		0	0		0	0
DW	1	2	0	0		0	0		0	0		0	0
DW	1	3	0	0		0	0		0	0		0	0
DW	1	4	0	0		0	0		0	0		0	0
DW	1	5	0	0		0	0		0	0		0	0
DW	0.5	1	0	0		0	0		0	0		0	0
DW	0.5	2	0	0		0	0		0	0		0	0
DW	0.5	3	0	0		0	0		0	0		0	0
DW	0.5	4	0	0		0	0		0	0		0	0
DW	0.5	5	0	0		0	0		0	0		0	0
EO
2	2	1	1	1	1	1	1	0	0	0	0	0	0
2	2	2	1	1	1	1	1	1	1	0	0	0	0
2	3	3	2	2	2	2	2	2	2	1	1	1	1
3	3	4	3	3	3	3	2	2	2	1	1	1	1
AgNPs
3	3	3	3	3	2	2	2	1	2	1	1	1	0
3	3	4	4	4	2	3	3	2	2	2	2	1	1
3	4	4	4	4	2	3	3	3	3	3	3	2	1
4	4	4	4	4	3	3	3	4	3	3	3	3	2
