# Supplementary material for: Acaricidal and insecticidal activities of entomopathogenic nematodes combined with rosemary essential oil and bacterium-synthesized silver nanoparticles against camel tick, Hyalomma dromedarii and wax moth, Galleria mellonella
Source: PeerJ. 2025 Jan 14;13:e18782. doi: 10.7717/peerj.18782 (PMC11740739; doi:10.7717/peerj.18782)
Supplement: Supplemental Information 4 — Here we show the absorbance of AgNPs, cell-free supernatant and AgNO3 respectively. [file peerj-13-18782-s004.xlsx]

## Sheet: Sheet1
	Wave length (nm)	Ag NPs	Cell-free supernatant	AgNO3
	0	1.5	2	2.4
	100	0.5	1	1
	200	0.5	0.5	0.3
	300	1.5	0.6	0.3
	400	1	0.25	0.3
	500	0.78	0.25	0.27
	600	0.22	0.23	0.23
	700	0.12	0.22	0.22
	800	0.11	0.22	0.22
	900	0	0.21	0.21
	1000	0	0.2	0.18
