# Supplementary material for: Acaricidal and insecticidal activities of entomopathogenic nematodes combined with rosemary essential oil and bacterium-synthesized silver nanoparticles against camel tick, Hyalomma dromedarii and wax moth, Galleria mellonella
Source: PeerJ. 2025 Jan 14;13:e18782. doi: 10.7717/peerj.18782 (PMC11740739; doi:10.7717/peerj.18782)
Supplement: Supplemental Information 5 [file peerj-13-18782-s005.xlsx]

## Sheet: Sheet1
Treatments	Conc.	R	24 h-Dead	24 M%	CM 24 h	48 h-Dead	48 M%	CM 48 h	72 h-Dead	72 M%	CM 72 h	96 h-Dead	96 M%	CM 96 h
SS	2000	1	3	60	58.3333	3	60	58.3333	4	80	79.1667	4	80	79.1667
SS	2000	2	3	60	58.3333	3	60	58.3333	3	60	58.3333	4	80	79.1667
SS	2000	3	3	60	58.3333	3	60	58.3333	4	80	79.1667	4	80	79.1667
SS	2000	4	4	80	79.1667	4	80	79.1667	4	80	79.1667	4	80	79.1667
SS	2000	5	3	60	58.3333	4	80	79.1667	4	80	79.1667	4	80	79.1667
SS	1500	1	3	60	58.3333	3	60	58.3333	4	80	79.1667	4	80	79.1667
SS	1500	2	2	40	37.5	3	60	58.3333	4	80	79.1667	4	80	79.1667
SS	1500	3	2	40	37.5	3	60	58.3333	3	60	58.3333	4	80	79.1667
SS	1500	4	3	60	58.3333	3	60	58.3333	3	60	58.3333	3	60	58.3333
SS	1500	5	3	60	58.3333	3	60	58.3333	3	60	58.3333	3	60	58.3333
SS	1000	1	3	60	58.3333	3	60	58.3333	4	80	79.1667	4	80	79.1667
SS	1000	2	2	40	37.5	3	60	58.3333	3	60	58.3333	3	60	58.3333
SS	1000	3	2	40	37.5	3	60	58.3333	3	60	58.3333	3	60	58.3333
SS	1000	4	2	40	37.5	2	40	37.5	3	60	58.3333	3	60	58.3333
SS	1000	5	2	40	37.5	2	40	37.5	2	40	37.5	3	60	58.3333
SS	500	1	2	40	37.5	2	40	37.5	3	60	58.3333	3	60	58.3333
SS	500	2	1	20	16.6667	2	40	37.5	2	40	37.5	2	40	37.5
SS	500	3	2	40	37.5	2	40	37.5	2	40	37.5	3	60	58.3333
SS	500	4	1	20	16.6667	2	40	37.5	2	40	37.5	2	40	37.5
SS	500	5	1	20	16.6667	1	20	16.6667	2	40	37.5	2	40	37.5
HI	2000	1	4	80	79.1667	5	100	100	5	100	100	5	100	100
HI	2000	2	4	80	79.1667	4	80	79.1667	5	100	100	5	100	100
HI	2000	3	4	80	79.1667	4	80	79.1667	5	100	100	5	100	100
HI	2000	4	4	80	79.1667	4	80	79.1667	4	80	79.1667	5	100	100
HI	2000	5	3	60	58.3333	4	80	79.1667	4	80	79.1667	4	80	79.1667
HI	1500	1	4	80	79.1667	4	80	79.1667	4	80	79.1667	4	80	79.1667
HI	1500	2	3	60	58.3333	4	80	79.1667	4	80	79.1667	5	100	100
HI	1500	3	3	60	58.3333	4	80	79.1667	4	80	79.1667	4	80	79.1667
HI	1500	4	3	60	58.3333	3	60	58.3333	4	80	79.1667	4	80	79.1667
HI	1500	5	3	60	58.3333	3	60	58.3333	4	80	79.1667	4	80	79.1667
HI	1000	1	3	60	58.3333	3	60	58.3333	4	80	79.1667	4	80	79.1667
HI	1000	2	3	60	58.3333	3	60	58.3333	4	80	79.1667	4	80	79.1667
HI	1000	3	2	40	37.5	3	60	58.3333	3	60	58.3333	4	80	79.1667
HI	1000	4	3	60	58.3333	3	60	58.3333	3	60	58.3333	3	60	58.3333
HI	1000	5	3	60	58.3333	3	60	58.3333	3	60	58.3333	3	60	58.3333
HI	500	1	3	60	58.3333	3	60	58.3333	4	80	79.1667	4	80	79.1667
HI	500	2	2	40	37.5	3	60	58.3333	3	60	58.3333	3	60	58.3333
HI	500	3	2	40	37.5	3	60	58.3333	3	60	58.3333	4	80	79.1667
HI	500	4	2	40	37.5	2	40	37.5	3	60	58.3333	3	60	58.3333
HI	500	5	3	60	58.3333	3	60	58.3333	3	60	58.3333	3	60	58.3333
EO	60	1	3	60	58.3333	3	60	58.3333	4	80	79.1667	4	80	79.1667
EO	60	2	3	60	58.3333	3	60	58.3333	4	80	79.1667	4	80	79.1667
EO	60	3	2	40	37.5	3	60	58.3333	3	60	58.3333	3	60	58.3333
EO	60	4	2	40	37.5	3	60	58.3333	3	60	58.3333	3	60	58.3333
EO	60	5	2	40	37.5	2	40	37.5	2	40	37.5	3	60	58.3333
EO	40	1	2	40	37.5	3	60	58.3333	3	60	58.3333	3	60	58.3333
EO	40	2	2	40	37.5	3	60	58.3333	3	60	58.3333	3	60	58.3333
EO	40	3	2	40	37.5	2	40	37.5	3	60	58.3333	3	60	58.3333
EO	40	4	2	40	37.5	2	40	37.5	3	60	58.3333	3	60	58.3333
EO	40	5	2	40	37.5	2	40	37.5	2	40	37.5	3	60	58.3333
EO	30	1	2	40	37.5	2	40	37.5	2	40	37.5	2	40	37.5
EO	30	2	2	40	37.5	2	40	37.5	2	40	37.5	2	40	37.5
EO	30	3	1	20	16.6667	2	40	37.5	2	40	37.5	3	60	58.3333
EO	30	4	1	20	16.6667	2	40	37.5	3	60	58.3333	3	60	58.3333
EO	30	5	1	20	16.6667	1	20	16.6667	2	40	37.5	2	40	37.5
EO	20	1	1	20	16.6667	2	40	37.5	2	40	37.5	2	40	37.5
EO	20	2	1	20	16.6667	2	40	37.5	2	40	37.5	2	40	37.5
EO	20	3	1	20	16.6667	1	20	16.6667	2	40	37.5	2	40	37.5
EO	20	4	1	20	16.6667	1	20	16.6667	2	40	37.5	2	40	37.5
EO	20	5	1	20	16.6667	1	20	16.6667	1	20	16.6667	2	40	37.5
AgNPs	4	1	2	40	37.5	3	60	58.3333	3	60	58.3333	3	60	58.3333
AgNPs	4	2	2	40	37.5	3	60	58.3333	3	60	58.3333	3	60	58.3333
AgNPs	4	3	2	40	37.5	2	40	37.5	3	60	58.3333	3	60	58.3333
AgNPs	4	4	2	40	37.5	2	40	37.5	2	40	37.5	3	60	58.3333
AgNPs	4	5	1	20	16.6667	1	20	16.6667	1	20	16.6667	1	20	16.6667
AgNPs	3	1	1	20	16.6667	2	40	37.5	2	40	37.5	2	40	37.5
AgNPs	3	2	1	20	16.6667	2	40	37.5	2	40	37.5	2	40	37.5
AgNPs	3	3	1	20	16.6667	1	20	16.6667	1	20	16.6667	2	40	37.5
AgNPs	3	4	2	40	37.5	2	40	37.5	2	40	37.5	2	40	37.5
AgNPs	3	5	2	40	37.5	2	40	37.5	2	40	37.5	2	40	37.5
AgNPs	2	1	1	20	16.6667	2	40	37.5	2	40	37.5	2	40	37.5
AgNPs	2	2	1	20	16.6667	2	40	37.5	2	40	37.5	2	40	37.5
AgNPs	2	3	1	20	16.6667	1	20	16.6667	1	20	16.6667	2	40	37.5
AgNPs	2	4	1	20	16.6667	1	20	16.6667	1	20	16.6667	1	20	16.6667
AgNPs	2	5	0	0	0	0	0	0	1	20	16.6667	1	20	16.6667
AgNPs	1	1	0	0	0	0	0	0	1	20	16.6667	1	20	16.6667
AgNPs	1	2	0	0	0	0	0	0	1	20	16.6667	1	20	16.6667
AgNPs	1	3	0	0	0	0	0	0	1	20	16.6667	1	20	16.6667
AgNPs	1	4	0	0	0	0	0	0	1	20	16.6667	1	20	16.6667
AgNPs	1	5	0	0	0	0	0	0	1	20	16.6667	1	20	16.6667
HI+EO	60	1	5	100	100	5	100	100	5	100	100	5	100	100
HI+EO	60	2	5	100	100	5	100	100	5	100	100	5	100	100
HI+EO	60	3	5	100	100	5	100	100	5	100	100	5	100	100
HI+EO	60	4	5	100	100	5	100	100	5	100	100	5	100	100
HI+EO	60	5	5	100	100	5	100	100	5	100	100	5	100	100
HI+EO	40	1	5	100	100	5	100	100	5	100	100	5	100	100
HI+EO	40	2	5	100	100	5	100	100	5	100	100	5	100	100
HI+EO	40	3	5	100	100	5	100	100	5	100	100	5	100	100
HI+EO	40	4	4	80	79.1667	5	100	100	5	100	100	5	100	100
HI+EO	40	5	4	80	79.1667	5	100	100	5	100	100	5	100	100
HI+EO	30	1	4	80	79.1667	5	100	100	5	100	100	5	100	100
HI+EO	30	2	4	80	79.1667	5	100	100	5	100	100	5	100	100
HI+EO	30	3	4	80	79.1667	4	80	79.1667	5	100	100	5	100	100
HI+EO	30	4	4	80	79.1667	4	80	79.1667	5	100	100	5	100	100
HI+EO	30	5	4	80	79.1667	4	80	79.1667	4	80	79.1667	5	100	100
HI+EO	20	1	4	80	79.1667	4	80	79.1667	5	100	100	5	100	100
HI+EO	20	2	4	80	79.1667	4	80	79.1667	5	100	100	5	100	100
HI+EO	20	3	4	80	79.1667	4	80	79.1667	4	80	79.1667	5	100	100
HI+EO	20	4	3	60	58.3333	4	80	79.1667	4	80	79.1667	4	80	79.1667
HI+EO	20	5	3	60	58.3333	4	80	79.1667	4	80	79.1667	4	80	79.1667
SS+AgNPs	4	1	5	100	100	5	100	100	5	100	100	5	100	100
SS+AgNPs	4	2	4	80	79.1667	5	100	100	5	100	100	5	100	100
SS+AgNPs	4	3	4	80	79.1667	4	80	79.1667	4	80	79.1667	5	100	100
SS+AgNPs	4	4	4	80	79.1667	4	80	79.1667	4	80	79.1667	4	80	79.1667
SS+AgNPs	4	5	4	80	79.1667	4	80	79.1667	4	80	79.1667	4	80	79.1667
SS+AgNPs	3	1	4	80	79.1667	4	80	79.1667	5	100	100	5	100	100
SS+AgNPs	3	2	4	80	79.1667	4	80	79.1667	4	80	79.1667	4	80	79.1667
SS+AgNPs	3	3	4	80	79.1667	4	80	79.1667	4	80	79.1667	5	100	100
SS+AgNPs	3	4	3	60	58.3333	4	80	79.1667	4	80	79.1667	4	80	79.1667
SS+AgNPs	3	5	3	60	58.3333	4	80	79.1667	4	80	79.1667	4	80	79.1667
SS+AgNPs	2	1	4	80	79.1667	4	80	79.1667	4	80	79.1667	4	80	79.1667
SS+AgNPs	2	2	3	60	58.3333	4	80	79.1667	4	80	79.1667	4	80	79.1667
SS+AgNPs	2	3	3	60	58.3333	3	60	58.3333	3	60	58.3333	4	80	79.1667
SS+AgNPs	2	4	3	60	58.3333	3	60	58.3333	3	60	58.3333	3	60	58.3333
SS+AgNPs	2	5	3	60	58.3333	3	60	58.3333	3	60	58.3333	3	60	58.3333
SS+AgNPs	1	1	3	60	58.3333	3	60	58.3333	3	60	58.3333	3	60	58.3333
SS+AgNPs	1	2	3	60	58.3333	3	60	58.3333	3	60	58.3333	3	60	58.3333
SS+AgNPs	1	3	3	60	58.3333	3	60	58.3333	3	60	58.3333	4	80	79.1667
SS+AgNPs	1	4	2	40	37.5	3	60	58.3333	3	60	58.3333	3	60	58.3333
SS+AgNPs	1	5	2	40	37.5	2	40	37.5	3	60	58.3333	3	60	58.3333
HI+AgNPs	4	1	5	100	100	5	100	100	5	100	100	5	100	100
HI+AgNPs	4	2	5	100	100	5	100	100	5	100	100	5	100	100
HI+AgNPs	4	3	5	100	100	5	100	100	5	100	100	5	100	100
HI+AgNPs	4	4	4	80	79.1667	5	100	100	5	100	100	5	100	100
HI+AgNPs	4	5	4	80	79.1667	4	80	79.1667	5	100	100	5	100	100
HI+AgNPs	3	1	4	80	79.1667	5	100	100	5	100	100	5	100	100
HI+AgNPs	3	2	4	80	79.1667	5	100	100	5	100	100	5	100	100
HI+AgNPs	3	3	4	80	79.1667	4	80	79.1667	4	80	79.1667	5	100	100
HI+AgNPs	3	4	4	80	79.1667	4	80	79.1667	4	80	79.1667	4	80	79.1667
HI+AgNPs	3	5	4	80	79.1667	4	80	79.1667	4	80	79.1667	4	80	79.1667
HI+AgNPs	2	1	4	80	79.1667	4	80	79.1667	4	80	79.1667	4	80	79.1667
HI+AgNPs	2	2	4	80	79.1667	4	80	79.1667	4	80	79.1667	4	80	79.1667
HI+AgNPs	2	3	4	80	79.1667	4	80	79.1667	4	80	79.1667	5	100	100
HI+AgNPs	2	4	3	60	58.3333	4	80	79.1667	4	80	79.1667	4	80	79.1667
HI+AgNPs	2	5	3	60	58.3333	3	60	58.3333	3	60	58.3333	3	60	58.3333
HI+AgNPs	1	1	4	80	79.1667	4	80	79.1667	4	80	79.1667	4	80	79.1667
HI+AgNPs	1	2	3	60	58.3333	4	80	79.1667	4	80	79.1667	4	80	79.1667
HI+AgNPs	1	3	3	60	58.3333	3	60	58.3333	3	60	58.3333	4	80	79.1667
HI+AgNPs	1	4	3	60	58.3333	3	60	58.3333	3	60	58.3333	3	60	58.3333
HI+AgNPs	1	5	3	60	58.3333	3	60	58.3333	3	60	58.3333	3	60	58.3333
SS+EO	60	1	5	100	100	5	100	100	5	100	100	5	100	100
SS+EO	60	2	4	80	79.1667	5	100	100	5	100	100	5	100	100
SS+EO	60	3	4	80	79.1667	4	80	79.1667	5	100	100	5	100	100
SS+EO	60	4	4	80	79.1667	4	80	79.1667	4	80	79.1667	5	100	100
SS+EO	60	5	5	100	100	5	100	100	5	100	100	5	100	100
SS+EO	40	1	4	80	79.1667	5	100	100	5	100	100	5	100	100
SS+EO	40	2	4	80	79.1667	4	80	79.1667	4	80	79.1667	4	80	79.1667
SS+EO	40	3	4	80	79.1667	4	80	79.1667	4	80	79.1667	5	100	100
SS+EO	40	4	4	80	79.1667	4	80	79.1667	4	80	79.1667	4	80	79.1667
SS+EO	40	5	4	80	79.1667	4	80	79.1667	4	80	79.1667	4	80	79.1667
SS+EO	30	1	4	80	79.1667	4	80	79.1667	4	80	79.1667	4	80	79.1667
SS+EO	30	2	4	80	79.1667	4	80	79.1667	4	80	79.1667	4	80	79.1667
SS+EO	30	3	4	80	79.1667	4	80	79.1667	4	80	79.1667	5	100	100
SS+EO	30	4	3	60	58.3333	4	80	79.1667	4	80	79.1667	4	80	79.1667
SS+EO	30	5	3	60	58.3333	3	60	58.3333	4	80	79.1667	4	80	79.1667
SS+EO	20	1	4	80	79.1667	4	80	79.1667	4	80	79.1667	4	80	79.1667
SS+EO	20	2	3	60	58.3333	4	80	79.1667	4	80	79.1667	4	80	79.1667
SS+EO	20	3	3	60	58.3333	3	60	58.3333	4	80	79.1667	4	80	79.1667
SS+EO	20	4	3	60	58.3333	3	60	58.3333	3	60	58.3333	4	80	79.1667
SS+EO	20	5	3	60	58.3333	3	60	58.3333	3	60	58.3333	3	60	58.3333
