# Supplementary material for: Acaricidal and insecticidal activities of entomopathogenic nematodes combined with rosemary essential oil and bacterium-synthesized silver nanoparticles against camel tick, Hyalomma dromedarii and wax moth, Galleria mellonella
Source: PeerJ. 2025 Jan 14;13:e18782. doi: 10.7717/peerj.18782 (PMC11740739; doi:10.7717/peerj.18782)
Supplement: Supplemental Information 7 [file peerj-13-18782-s007.xlsx]

## Sheet: Final
Treatments	Conc.	R	24 h-Dead	24 M%	CM 24 h	48 h-Dead	48 M%	CM 48 h	72 h-Dead	72 M%	CM 72 h	96 h-Dead	96 M%	CM 96 h	40	4
SS	2000	1	9	90	89.5833	9	90	89.5833	10	100	100	10	100	100	40	4
SS	2000	2	9	90	89.5833	9	90	89.5833	10	100	100	10	100	100	40	4
SS	2000	3	8	80	79.1667	9	90	89.5833	9	90	89.5833	10	100	100	40	4
SS	2000	4	8	80	79.1667	9	90	89.5833	9	90	89.5833	10	100	100	40	4
SS	2000	5	7	70	68.75	9	90	89.5833	9	90	89.5833	9	90	89.5833	40	4
SS	1000	1	8	80	79.1667	9	90	89.5833	10	100	100	10	100	100	40	4
SS	1000	2	8	80	79.1667	9	90	89.5833	9	90	89.5833	10	100	100	40	4
SS	1000	3	8	80	79.1667	9	90	89.5833	9	90	89.5833	10	100	100	40	4
SS	1000	4	8	80	79.1667	8	80	79.1667	9	90	89.5833	9	90	89.5833	40	4
SS	1000	5	8	80	79.1667	8	80	79.1667	8	80	79.1667	8	80	79.1667	40	4
SS	500	1	8	80	79.1667	9	90	89.5833	9	90	89.5833	10	100	100	40	4
SS	500	2	7	70	68.75	8	80	79.1667	9	90	89.5833	9	90	89.5833	40	4
SS	500	3	8	80	79.1667	8	80	79.1667	9	90	89.5833	9	90	89.5833	40	4
SS	500	4	7	70	68.75	8	80	79.1667	8	80	79.1667	9	90	89.5833	40	4
SS	500	5	7	70	68.75	8	80	79.1667	8	80	79.1667	8	80	79.1667	40	4
SS	250	1	7	70	68.75	7	70	68.75	8	80	79.1667	8	80	79.1667	40	4
SS	250	2	6	60	58.3333	7	70	68.75	8	80	79.1667	8	80	79.1667	40	4
SS	250	3	6	60	58.3333	7	70	68.75	7	70	68.75	8	80	79.1667	40	4
SS	250	4	6	60	58.3333	7	70	68.75	7	70	68.75	8	80	79.1667	40	4
SS	250	5	7	70	68.75	7	70	68.75	7	70	68.75	7	70	68.75	40	4
HI	2000	1	10	100	100	10	100	100	10	100	100	10	100	100	40	4
HI	2000	2	10	100	100	10	100	100	10	100	100	10	100	100	40	4
HI	2000	3	9	90	89.5833	10	100	100	10	100	100	10	100	100	40	4
HI	2000	4	9	90	89.5833	10	100	100	10	100	100	10	100	100	40	4
HI	2000	5	9	90	89.5833	10	100	100	10	100	100	10	100	100	40	4
HI	1000	1	9	90	89.5833	10	100	100	10	100	100	10	100	100	40	4
HI	1000	2	9	90	89.5833	10	100	100	10	100	100	10	100	100	40	4
HI	1000	3	9	90	89.5833	9	90	89.5833	10	100	100	10	100	100	40	4
HI	1000	4	9	90	89.5833	9	90	89.5833	10	100	100	10	100	100	40	4
HI	1000	5	10	100	100	10	100	100	10	100	100	10	100	100	40	4
HI	500	1	9	90	89.5833	9	90	89.5833	10	100	100	10	100	100	40	4
HI	500	2	9	90	89.5833	9	90	89.5833	10	100	100	10	100	100	40	4
HI	500	3	8	80	79.1667	9	90	89.5833	9	90	89.5833	10	100	100	40	4
HI	500	4	8	80	79.1667	9	90	89.5833	9	90	89.5833	10	100	100	40	4
HI	500	5	8	80	79.1667	9	90	89.5833	9	90	89.5833	9	90	89.5833	40	4
HI	250	1	8	80	79.1667	8	80	79.1667	9	90	89.5833	10	100	100	40	4
HI	250	2	8	80	79.1667	8	80	79.1667	9	90	89.5833	9	90	89.5833	40	4
HI	250	3	8	80	79.1667	8	80	79.1667	8	80	79.1667	9	90	89.5833	40	4
HI	250	4	7	70	68.75	8	80	79.1667	8	80	79.1667	8	80	79.1667	40	4
HI	250	5	7	70	68.75	8	80	79.1667	8	80	79.1667	8	80	79.1667	40	4
EO	60	1	6	60	58.3333	7	70	68.75	8	80	79.1667	8	80	79.1667	40	4
EO	60	2	6	60	58.3333	7	70	68.75	8	80	79.1667	8	80	79.1667	40	4
EO	60	3	6	60	58.3333	6	60	58.3333	6	60	58.3333	8	80	79.1667	40	4
EO	60	4	7	70	68.75	7	70	68.75	7	70	68.75	8	80	79.1667	40	4
EO	60	5	6	60	58.3333	6	60	58.3333	6	60	58.3333	6	60	58.3333	40	4
EO	40	1	6	60	58.3333	6	60	58.3333	7	70	68.75	7	70	68.75	40	4
EO	40	2	6	60	58.3333	6	60	58.3333	7	70	68.75	7	70	68.75	40	4
EO	40	3	5	50	47.9167	6	60	58.3333	6	60	58.3333	6	60	58.3333	40	4
EO	40	4	5	50	47.9167	6	60	58.3333	6	60	58.3333	7	70	68.75	40	4
EO	40	5	5	50	47.9167	5	50	47.9167	5	50	47.9167	6	60	58.3333	40	4
EO	30	1	5	50	47.9167	5	50	47.9167	5	50	47.9167	5	50	47.9167	40	4
EO	30	2	4	40	37.5	5	50	47.9167	5	50	47.9167	6	60	58.3333	40	4
EO	30	3	4	40	37.5	5	50	47.9167	5	50	47.9167	6	60	58.3333	40	4
EO	30	4	4	40	37.5	4	40	37.5	5	50	47.9167	5	50	47.9167	40	4
EO	30	5	4	40	37.5	4	40	37.5	5	50	47.9167	5	50	47.9167	40	4
EO	20	1	4	40	37.5	4	40	37.5	5	50	47.9167	5	50	47.9167	40	4
EO	20	2	4	40	37.5	4	40	37.5	5	50	47.9167	5	50	47.9167	40	4
EO	20	3	4	40	37.5	4	40	37.5	4	40	37.5	5	50	47.9167	40	4
EO	20	4	3	30	27.0833	4	40	37.5	4	40	37.5	5	50	47.9167	40	4
EO	20	5	3	30	27.0833	4	40	37.5	4	40	37.5	4	40	37.5	40	4
AgNPs	4	1	5	50	47.9167	6	60	58.3333	6	60	58.3333	7	70	68.75	40	4
AgNPs	4	2	5	50	47.9167	6	60	58.3333	6	60	58.3333	7	70	68.75	40	4
AgNPs	4	3	5	50	47.9167	5	50	47.9167	6	60	58.3333	6	60	58.3333	40	4
AgNPs	4	4	5	50	47.9167	5	50	47.9167	6	60	58.3333	6	60	58.3333	40	4
AgNPs	4	5	6	60	58.3333	6	60	58.3333	6	60	58.3333	6	60	58.3333	40	4
AgNPs	3	1	5	50	47.9167	5	50	47.9167	5	50	47.9167	6	60	58.3333	40	4
AgNPs	3	2	5	50	47.9167	5	50	47.9167	5	50	47.9167	6	60	58.3333	40	4
AgNPs	3	3	4	40	37.5	5	50	47.9167	6	60	58.3333	6	60	58.3333	40	4
AgNPs	3	4	4	40	37.5	4	40	37.5	5	50	47.9167	5	50	47.9167	40	4
AgNPs	3	5	4	40	37.5	4	40	37.5	4	40	37.5	4	40	37.5	40	4
AgNPs	2	1	4	40	37.5	4	40	37.5	5	50	47.9167	5	50	47.9167	40	4
AgNPs	2	2	4	40	37.5	4	40	37.5	5	50	47.9167	5	50	47.9167	40	4
AgNPs	2	3	3	30	27.0833	4	40	37.5	4	40	37.5	5	50	47.9167	40	4
AgNPs	2	4	3	30	27.0833	4	40	37.5	4	40	37.5	4	40	37.5	40	4
AgNPs	2	5	3	30	27.0833	3	30	27.0833	3	30	27.0833	4	40	37.5	40	4
AgNPs	1	1	3	30	27.0833	3	30	27.0833	4	40	37.5	4	40	37.5	40	4
AgNPs	1	2	2	20	16.6667	3	30	27.0833	4	40	37.5	4	40	37.5	40	4
AgNPs	1	3	2	20	16.6667	3	30	27.0833	3	30	27.0833	4	40	37.5	40	4
AgNPs	1	4	3	30	27.0833	3	30	27.0833	3	30	27.0833	4	40	37.5	40	4
AgNPs	1	5	3	30	27.0833	3	30	27.0833	3	30	27.0833	3	30	27.0833	40	4
HI+EO	60	1	10	100	100	10	100	100	10	100	100	10	100	100	40	4
HI+EO	60	2	10	100	100	10	100	100	10	100	100	10	100	100	40	4
HI+EO	60	3	10	100	100	10	100	100	10	100	100	10	100	100	40	4
HI+EO	60	4	10	100	100	10	100	100	10	100	100	10	100	100	40	4
HI+EO	60	5	10	100	100	10	100	100	10	100	100	10	100	100	40	4
HI+EO	40	1	10	100	100	10	100	100	10	100	100	10	100	100	40	4
HI+EO	40	2	10	100	100	10	100	100	10	100	100	10	100	100	40	4
HI+EO	40	3	10	100	100	10	100	100	10	100	100	10	100	100	40	4
HI+EO	40	4	10	100	100	10	100	100	10	100	100	10	100	100	40	4
HI+EO	40	5	10	100	100	10	100	100	10	100	100	10	100	100	40	4
HI+EO	30	1	10	100	100	10	100	100	10	100	100	10	100	100	40	4
HI+EO	30	2	9	90	89.5833	10	100	100	10	100	100	10	100	100	40	4
HI+EO	30	3	9	90	89.5833	10	100	100	10	100	100	10	100	100	40	4
HI+EO	30	4	9	90	89.5833	9	90	89.5833	10	100	100	10	100	100	40	4
HI+EO	30	5	9	90	89.5833	9	90	89.5833	10	100	100	10	100	100	40	4
HI+EO	20	1	9	90	89.5833	10	100	100	10	100	100	10	100	100	40	4
HI+EO	20	2	9	90	89.5833	9	90	89.5833	10	100	100	10	100	100	40	4
HI+EO	20	3	8	80	79.1667	9	90	89.5833	10	100	100	10	100	100	40	4
HI+EO	20	4	8	80	79.1667	9	90	89.5833	9	90	89.5833	10	100	100	40	4
HI+EO	20	5	8	80	79.1667	8	80	79.1667	8	80	79.1667	10	100	100	40	4
SS+AgNPs	4	1	10	100	100	10	100	100	10	100	100	10	100	100	40	4
SS+AgNPs	4	2	10	100	100	10	100	100	10	100	100	10	100	100	40	4
SS+AgNPs	4	3	9	90	89.5833	10	100	100	10	100	100	10	100	100	40	4
SS+AgNPs	4	4	9	90	89.5833	9	90	89.5833	10	100	100	10	100	100	40	4
SS+AgNPs	4	5	9	90	89.5833	9	90	89.5833	10	100	100	10	100	100	40	4
SS+AgNPs	3	1	9	90	89.5833	10	100	100	10	100	100	10	100	100	40	4
SS+AgNPs	3	2	9	90	89.5833	9	90	89.5833	10	100	100	10	100	100	40	4
SS+AgNPs	3	3	9	90	89.5833	9	90	89.5833	9	90	89.5833	10	100	100	40	4
SS+AgNPs	3	4	8	80	79.1667	9	90	89.5833	9	90	89.5833	10	100	100	40	4
SS+AgNPs	3	5	8	80	79.1667	9	90	89.5833	9	90	89.5833	9	90	89.5833	40	4
SS+AgNPs	2	1	8	80	79.1667	8	80	79.1667	9	90	89.5833	10	100	100	40	4
SS+AgNPs	2	2	8	80	79.1667	9	90	89.5833	9	90	89.5833	10	100	100	40	4
SS+AgNPs	2	3	8	80	79.1667	8	80	79.1667	9	90	89.5833	9	90	89.5833	40	4
SS+AgNPs	2	4	9	90	89.5833	9	90	89.5833	9	90	89.5833	9	90	89.5833	40	4
SS+AgNPs	2	5	9	90	89.5833	9	90	89.5833	9	90	89.5833	9	90	89.5833	40	4
SS+AgNPs	1	1	8	80	79.1667	8	80	79.1667	9	90	89.5833	9	90	89.5833	40	4
SS+AgNPs	1	2	8	80	79.1667	8	80	79.1667	9	90	89.5833	9	90	89.5833	40	4
SS+AgNPs	1	3	7	70	68.75	7	70	68.75	7	70	68.75	7	70	68.75	40	4
SS+AgNPs	1	4	7	70	68.75	7	70	68.75	7	70	68.75	7	70	68.75	40	4
SS+AgNPs	1	5	6	60	58.3333	6	60	58.3333	6	60	58.3333	8	80	79.1667	40	4
HI+AgNPs	4	1	10	100	100	10	100	100	10	100	100	10	100	100	40	4
HI+AgNPs	4	2	10	100	100	10	100	100	10	100	100	10	100	100	40	4
HI+AgNPs	4	3	10	100	100	10	100	100	10	100	100	10	100	100	40	4
HI+AgNPs	4	4	9	90	89.5833	10	100	100	10	100	100	10	100	100	40	4
HI+AgNPs	4	5	9	90	89.5833	10	100	100	10	100	100	10	100	100	40	4
HI+AgNPs	3	1	9	90	89.5833	10	100	100	10	100	100	10	100	100	40	4
HI+AgNPs	3	2	9	90	89.5833	10	100	100	10	100	100	10	100	100	40	4
HI+AgNPs	3	3	9	90	89.5833	10	100	100	10	100	100	10	100	100	40	4
HI+AgNPs	3	4	9	90	89.5833	9	90	89.5833	10	100	100	10	100	100	40	4
HI+AgNPs	3	5	9	90	89.5833	9	90	89.5833	10	100	100	10	100	100	40	4
HI+AgNPs	2	1	9	90	89.5833	9	90	89.5833	10	100	100	10	100	100	40	4
HI+AgNPs	2	2	9	90	89.5833	9	90	89.5833	9	90	89.5833	10	100	100	40	4
HI+AgNPs	2	3	8	80	79.1667	9	90	89.5833	9	90	89.5833	10	100	100	40	4
HI+AgNPs	2	4	8	80	79.1667	9	90	89.5833	9	90	89.5833	9	90	89.5833	40	4
HI+AgNPs	2	5	8	80	79.1667	8	80	79.1667	9	90	89.5833	9	90	89.5833	40	4
HI+AgNPs	1	1	8	80	79.1667	9	90	89.5833	9	90	89.5833	9	90	89.5833	40	4
HI+AgNPs	1	2	8	80	79.1667	8	80	79.1667	9	90	89.5833	9	90	89.5833	40	4
HI+AgNPs	1	3	8	80	79.1667	8	80	79.1667	9	90	89.5833	9	90	89.5833	40	4
HI+AgNPs	1	4	8	80	79.1667	8	80	79.1667	8	80	79.1667	9	90	89.5833	40	4
HI+AgNPs	1	5	7	70	68.75	8	80	79.1667	8	80	79.1667	9	90	89.5833	40	4
SS+EO	60	1	10	100	100	10	100	100	10	100	100	10	100	100	40	4
SS+EO	60	2	10	100	100	10	100	100	10	100	100	10	100	100	40	4
SS+EO	60	3	10	100	100	10	100	100	10	100	100	10	100	100	40	4
SS+EO	60	4	9	90	89.5833	10	100	100	10	100	100	10	100	100	40	4
SS+EO	60	5	9	90	89.5833	10	100	100	10	100	100	10	100	100	40	4
SS+EO	40	1	9	90	89.5833	10	100	100	10	100	100	10	100	100	40	4
SS+EO	40	2	9	90	89.5833	10	100	100	10	100	100	10	100	100	40	4
SS+EO	40	3	9	90	89.5833	10	100	100	10	100	100	10	100	100	40	4
SS+EO	40	4	9	90	89.5833	9	90	89.5833	10	100	100	10	100	100	40	4
SS+EO	40	5	9	90	89.5833	9	90	89.5833	10	100	100	10	100	100	40	4
SS+EO	30	1	9	90	89.5833	9	90	89.5833	10	100	100	10	100	100	40	4
SS+EO	30	2	9	90	89.5833	9	90	89.5833	10	100	100	10	100	100	40	4
SS+EO	30	3	8	80	79.1667	9	90	89.5833	9	90	89.5833	10	100	100	40	4
SS+EO	30	4	8	80	79.1667	9	90	89.5833	9	90	89.5833	10	100	100	40	4
SS+EO	30	5	8	80	79.1667	9	90	89.5833	9	90	89.5833	9	90	89.5833	40	4
SS+EO	20	1	8	80	79.1667	8	80	79.1667	9	90	89.5833	9	90	89.5833	40	4
SS+EO	20	2	8	80	79.1667	8	80	79.1667	9	90	89.5833	9	90	89.5833	40	4
SS+EO	20	3	8	80	79.1667	8	80	79.1667	8	80	79.1667	9	90	89.5833	40	4
SS+EO	20	4	7	70	68.75	8	80	79.1667	8	80	79.1667	9	90	89.5833	40	4
SS+EO	20	5	7	70	68.75	8	80	79.1667	8	80	79.1667	8	80	79.1667	40	4
