# Supplementary material for: Acaricidal and insecticidal activities of entomopathogenic nematodes combined with rosemary essential oil and bacterium-synthesized silver nanoparticles against camel tick, Hyalomma dromedarii and wax moth, Galleria mellonella
Source: PeerJ. 2025 Jan 14;13:e18782. doi: 10.7717/peerj.18782 (PMC11740739; doi:10.7717/peerj.18782)
Supplement: Supplemental Information 8 [file peerj-13-18782-s008.xlsx]

## Sheet: Final
Treatments	Conc.	R	24 h-Dead	24 M%	CM 24 h	48 h-Dead	48 M%	CM 48 h	72 h-Dead	72 M%	CM 72 h	96 h-Dead	96 M%	CM 96 h	40	5
SS	1200	1	35	87.5	86.8421	35	87.5	86.8421	35	87.5	86.8421	36	90	89.4737	40	5
SS	1200	2	32	80	78.9474	34	85	84.2105	35	87.5	86.8421	36	90	89.4737	40	5
SS	1200	3	32	80	78.9474	33	82.5	81.5789	35	87.5	86.8421	36	90	89.4737	40	5
SS	1200	4	30	75	73.6842	31	77.5	76.3158	35	87.5	86.8421	36	90	89.4737	40	5
SS	1200	5	34	85	84.2105	34	85	84.2105	35	87.5	86.8421	35	87.5	86.8421	40	5
SS	600	1	30	75	73.6842	30	75	73.6842	30	75	73.6842	32	80	78.9474	40	5
SS	600	2	28	70	68.4211	29	72.5	71.0526	30	75	73.6842	32	80	78.9474	40	5
SS	600	3	26	65	63.1579	28	70	68.4211	30	75	73.6842	30	75	73.6842	40	5
SS	600	4	27	67.5	65.7895	27	67.5	65.7895	29	72.5	71.0526	30	75	73.6842	40	5
SS	600	5	28	70	68.4211	28	70	68.4211	29	72.5	71.0526	30	75	73.6842	40	5
SS	300	1	25	62.5	60.5263	25	62.5	60.5263	27	67.5	65.7895	29	72.5	71.0526	40	5
SS	300	2	25	62.5	60.5263	25	62.5	60.5263	25	62.5	60.5263	29	72.5	71.0526	40	5
SS	300	3	25	62.5	60.5263	25	62.5	60.5263	25	62.5	60.5263	29	72.5	71.0526	40	5
SS	300	4	22	55	52.6316	24	60	57.8947	26	65	63.1579	30	75	73.6842	40	5
SS	300	5	23	57.5	55.2632	24	60	57.8947	26	65	63.1579	28	70	68.4211	40	5
SS	150	1	19	47.5	44.7368	19	47.5	44.7368	20	50	47.3684	22	55	52.6316	40	5
SS	150	2	17	42.5	39.4737	17	42.5	39.4737	17	42.5	39.4737	20	50	47.3684	40	5
SS	150	3	16	40	36.8421	16	40	36.8421	18	45	42.1053	20	50	47.3684	40	5
SS	150	4	15	37.5	34.2105	16	40	36.8421	18	45	42.1053	20	50	47.3684	40	5
SS	150	5	15	37.5	34.2105	17	42.5	39.4737	18	45	42.1053	20	50	47.3684	40	5
HI	1200	1	37	92.5	92.1053	37	92.5	92.1053	39	97.5	97.3684	40	100	100	40	5
HI	1200	2	36	90	89.4737	37	92.5	92.1053	39	97.5	97.3684	40	100	100	40	5
HI	1200	3	35	87.5	86.8421	38	95	94.7368	38	95	94.7368	40	100	100	40	5
HI	1200	4	36	90	89.4737	38	95	94.7368	38	95	94.7368	39	97.5	97.3684	40	5
HI	1200	5	36	90	89.4737	37	92.5	92.1053	38	95	94.7368	39	97.5	97.3684	40	5
HI	600	1	32	80	78.9474	33	82.5	81.5789	35	87.5	86.8421	37	92.5	92.1053	40	5
HI	600	2	33	82.5	81.5789	34	85	84.2105	36	90	89.4737	37	92.5	92.1053	40	5
HI	600	3	33	82.5	81.5789	33	82.5	81.5789	35	87.5	86.8421	37	92.5	92.1053	40	5
HI	600	4	32	80	78.9474	35	87.5	86.8421	36	90	89.4737	37	92.5	92.1053	40	5
HI	600	5	34	85	84.2105	34	85	84.2105	36	90	89.4737	37	92.5	92.1053	40	5
HI	300	1	30	75	73.6842	30	75	73.6842	32	80	78.9474	34	85	84.2105	40	5
HI	300	2	29	72.5	71.0526	30	75	73.6842	32	80	78.9474	34	85	84.2105	40	5
HI	300	3	29	72.5	71.0526	29	72.5	71.0526	31	77.5	76.3158	33	82.5	81.5789	40	5
HI	300	4	28	70	68.4211	30	75	73.6842	30	75	73.6842	33	82.5	81.5789	40	5
HI	300	5	28	70	68.4211	28	70	68.4211	30	75	73.6842	32	80	78.9474	40	5
HI	150	1	25	62.5	60.5263	25	62.5	60.5263	27	67.5	65.7895	30	75	73.6842	40	5
HI	150	2	25	62.5	60.5263	25	62.5	60.5263	27	67.5	65.7895	30	75	73.6842	40	5
HI	150	3	24	60	57.8947	26	65	63.1579	27	67.5	65.7895	30	75	73.6842	40	5
HI	150	4	24	60	57.8947	26	65	63.1579	27	67.5	65.7895	30	75	73.6842	40	5
HI	150	5	24	60	57.8947	26	65	63.1579	26	65	63.1579	29	72.5	71.0526	40	5
EO	25	1	23	57.5	55.2632	23	57.5	55.2632	23	57.5	55.2632	25	62.5	60.5263	40	5
EO	25	2	20	50	47.3684	22	55	52.6316	23	57.5	55.2632	25	62.5	60.5263	40	5
EO	25	3	20	50	47.3684	22	55	52.6316	23	57.5	55.2632	25	62.5	60.5263	40	5
EO	25	4	20	50	47.3684	21	52.5	50	23	57.5	55.2632	25	62.5	60.5263	40	5
EO	25	5	21	52.5	50	21	52.5	50	22	55	52.6316	25	62.5	60.5263	40	5
EO	20	1	20	50	47.3684	20	50	47.3684	20	50	47.3684	22	55	52.6316	40	5
EO	20	2	18	45	42.1053	18	45	42.1053	20	50	47.3684	22	55	52.6316	40	5
EO	20	3	18	45	42.1053	18	45	42.1053	20	50	47.3684	21	52.5	50	40	5
EO	20	4	17	42.5	39.4737	18	45	42.1053	19	47.5	44.7368	20	50	47.3684	40	5
EO	20	5	16	40	36.8421	19	47.5	44.7368	19	47.5	44.7368	21	52.5	50	40	5
EO	15	1	15	37.5	34.2105	15	37.5	34.2105	16	40	36.8421	18	45	42.1053	40	5
EO	15	2	13	32.5	28.9474	14	35	31.5789	15	37.5	34.2105	17	42.5	39.4737	40	5
EO	15	3	13	32.5	28.9474	13	32.5	28.9474	15	37.5	34.2105	17	42.5	39.4737	40	5
EO	15	4	12	30	26.3158	14	35	31.5789	15	37.5	34.2105	16	40	36.8421	40	5
EO	15	5	14	35	31.5789	14	35	31.5789	15	37.5	34.2105	17	42.5	39.4737	40	5
EO	10	1	10	25	21.0526	12	30	26.3158	12	30	26.3158	14	35	31.5789	40	5
EO	10	2	10	25	21.0526	11	27.5	23.6842	13	32.5	28.9474	14	35	31.5789	40	5
EO	10	3	11	27.5	23.6842	11	27.5	23.6842	13	32.5	28.9474	14	35	31.5789	40	5
EO	10	4	12	30	26.3158	12	30	26.3158	13	32.5	28.9474	14	35	31.5789	40	5
EO	10	5	10	25	21.0526	12	30	26.3158	12	30	26.3158	14	35	31.5789	40	5
AgNPs	2	1	19	47.5	44.7368	19	47.5	44.7368	20	50	47.3684	20	50	47.3684	40	5
AgNPs	2	2	19	47.5	44.7368	20	50	47.3684	21	52.5	50	22	55	52.6316	40	5
AgNPs	2	3	18	45	42.1053	20	50	47.3684	21	52.5	50	22	55	52.6316	40	5
AgNPs	2	4	18	45	42.1053	20	50	47.3684	20	50	47.3684	22	55	52.6316	40	5
AgNPs	2	5	18	45	42.1053	18	45	42.1053	20	50	47.3684	22	55	52.6316	40	5
AgNPs	1.5	1	15	37.5	34.2105	15	37.5	34.2105	17	42.5	39.4737	19	47.5	44.7368	40	5
AgNPs	1.5	2	14	35	31.5789	16	40	36.8421	17	42.5	39.4737	19	47.5	44.7368	40	5
AgNPs	1.5	3	14	35	31.5789	16	40	36.8421	17	42.5	39.4737	18	45	42.1053	40	5
AgNPs	1.5	4	16	40	36.8421	16	40	36.8421	16	40	36.8421	18	45	42.1053	40	5
AgNPs	1.5	5	14	35	31.5789	15	37.5	34.2105	16	40	36.8421	18	45	42.1053	40	5
AgNPs	1	1	13	32.5	28.9474	13	32.5	28.9474	14	35	31.5789	16	40	36.8421	40	5
AgNPs	1	2	12	30	26.3158	13	32.5	28.9474	14	35	31.5789	16	40	36.8421	40	5
AgNPs	1	3	12	30	26.3158	13	32.5	28.9474	14	35	31.5789	16	40	36.8421	40	5
AgNPs	1	4	12	30	26.3158	14	35	31.5789	14	35	31.5789	15	37.5	34.2105	40	5
AgNPs	1	5	13	32.5	28.9474	13	32.5	28.9474	14	35	31.5789	15	37.5	34.2105	40	5
AgNPs	0.5	1	10	25	21.0526	10	25	21.0526	12	30	26.3158	14	35	31.5789	40	5
AgNPs	0.5	2	9	22.5	18.4211	10	25	21.0526	12	30	26.3158	13	32.5	28.9474	40	5
AgNPs	0.5	3	9	22.5	18.4211	10	25	21.0526	12	30	26.3158	13	32.5	28.9474	40	5
AgNPs	0.5	4	9	22.5	18.4211	11	27.5	23.6842	11	27.5	23.6842	13	32.5	28.9474	40	5
AgNPs	0.5	5	8	20	15.7895	11	27.5	23.6842	11	27.5	23.6842	12	30	26.3158	40	5
HI+EO	25	1	40	100	100	40	100	100	40	100	100	40	100	100	40	5
HI+EO	25	2	40	100	100	40	100	100	40	100	100	40	100	100	40	5
HI+EO	25	3	40	100	100	40	100	100	40	100	100	40	100	100	40	5
HI+EO	25	4	40	100	100	40	100	100	40	100	100	40	100	100	40	5
HI+EO	25	5	40	100	100	40	100	100	40	100	100	40	100	100	40	5
HI+EO	20	1	40	100	100	40	100	100	40	100	100	40	100	100	40	5
HI+EO	20	2	40	100	100	40	100	100	40	100	100	40	100	100	40	5
HI+EO	20	3	40	100	100	40	100	100	40	100	100	40	100	100	40	5
HI+EO	20	4	38	95	94.7368	40	100	100	40	100	100	40	100	100	40	5
HI+EO	20	5	38	95	94.7368	40	100	100	40	100	100	40	100	100	40	5
HI+EO	15	1	35	87.5	86.8421	37	92.5	92.1053	40	100	100	40	100	100	40	5
HI+EO	15	2	36	90	89.4737	37	92.5	92.1053	39	97.5	97.3684	40	100	100	40	5
HI+EO	15	3	36	90	89.4737	38	95	94.7368	38	95	94.7368	40	100	100	40	5
HI+EO	15	4	36	90	89.4737	36	90	89.4737	38	95	94.7368	40	100	100	40	5
HI+EO	15	5	34	85	84.2105	37	92.5	92.1053	38	95	94.7368	40	100	100	40	5
HI+EO	10	1	33	82.5	81.5789	33	82.5	81.5789	35	87.5	86.8421	37	92.5	92.1053	40	5
HI+EO	10	2	32	80	78.9474	33	82.5	81.5789	35	87.5	86.8421	37	92.5	92.1053	40	5
HI+EO	10	3	32	80	78.9474	33	82.5	81.5789	35	87.5	86.8421	38	95	94.7368	40	5
HI+EO	10	4	32	80	78.9474	34	85	84.2105	34	85	84.2105	37	92.5	92.1053	40	5
HI+EO	10	5	33	82.5	81.5789	33	82.5	81.5789	35	87.5	86.8421	38	95	94.7368	40	5
SS+AgNPs	2	1	37	92.5	92.1053	37	92.5	92.1053	38	95	94.7368	38	95	94.7368	40	5
SS+AgNPs	2	2	36	90	89.4737	37	92.5	92.1053	38	95	94.7368	38	95	94.7368	40	5
SS+AgNPs	2	3	36	90	89.4737	37	92.5	92.1053	37	92.5	92.1053	37	92.5	92.1053	40	5
SS+AgNPs	2	4	36	90	89.4737	36	90	89.4737	38	95	94.7368	38	95	94.7368	40	5
SS+AgNPs	2	5	36	90	89.4737	36	90	89.4737	37	92.5	92.1053	37	92.5	92.1053	40	5
SS+AgNPs	1.5	1	33	82.5	81.5789	34	85	84.2105	35	87.5	86.8421	35	87.5	86.8421	40	5
SS+AgNPs	1.5	2	33	82.5	81.5789	34	85	84.2105	35	87.5	86.8421	35	87.5	86.8421	40	5
SS+AgNPs	1.5	3	33	82.5	81.5789	34	85	84.2105	35	87.5	86.8421	35	87.5	86.8421	40	5
SS+AgNPs	1.5	4	34	85	84.2105	34	85	84.2105	36	90	89.4737	36	90	89.4737	40	5
SS+AgNPs	1.5	5	34	85	84.2105	34	85	84.2105	35	87.5	86.8421	35	87.5	86.8421	40	5
SS+AgNPs	1	1	30	75	73.6842	32	80	78.9474	34	85	84.2105	34	85	84.2105	40	5
SS+AgNPs	1	2	30	75	73.6842	31	77.5	76.3158	33	82.5	81.5789	33	82.5	81.5789	40	5
SS+AgNPs	1	3	29	72.5	71.0526	29	72.5	71.0526	30	75	73.6842	30	75	73.6842	40	5
SS+AgNPs	1	4	30	75	73.6842	30	75	73.6842	30	75	73.6842	30	75	73.6842	40	5
SS+AgNPs	1	5	28	70	68.4211	30	75	73.6842	32	80	78.9474	32	80	78.9474	40	5
SS+AgNPs	0.5	1	27	67.5	65.7895	27	67.5	65.7895	29	72.5	71.0526	29	72.5	71.0526	40	5
SS+AgNPs	0.5	2	25	62.5	60.5263	27	67.5	65.7895	28	70	68.4211	28	70	68.4211	40	5
SS+AgNPs	0.5	3	28	70	68.4211	28	70	68.4211	28	70	68.4211	28	70	68.4211	40	5
SS+AgNPs	0.5	4	25	62.5	60.5263	26	65	63.1579	28	70	68.4211	28	70	68.4211	40	5
SS+AgNPs	0.5	5	26	65	63.1579	26	65	63.1579	27	67.5	65.7895	27	67.5	65.7895	40	5
HI+AgNPs	2	1	37	92.5	92.1053	38	95	94.7368	39	97.5	97.3684	40	100	100	40	5
HI+AgNPs	2	2	37	92.5	92.1053	38	95	94.7368	39	97.5	97.3684	40	100	100	40	5
HI+AgNPs	2	3	37	92.5	92.1053	38	95	94.7368	39	97.5	97.3684	40	100	100	40	5
HI+AgNPs	2	4	37	92.5	92.1053	38	95	94.7368	39	97.5	97.3684	40	100	100	40	5
HI+AgNPs	2	5	37	92.5	92.1053	37	92.5	92.1053	39	97.5	97.3684	40	100	100	40	5
HI+AgNPs	1.5	1	34	85	84.2105	34	85	84.2105	36	90	89.4737	37	92.5	92.1053	40	5
HI+AgNPs	1.5	2	34	85	84.2105	34	85	84.2105	36	90	89.4737	38	95	94.7368	40	5
HI+AgNPs	1.5	3	33	82.5	81.5789	35	87.5	86.8421	36	90	89.4737	38	95	94.7368	40	5
HI+AgNPs	1.5	4	34	85	84.2105	35	87.5	86.8421	35	87.5	86.8421	37	92.5	92.1053	40	5
HI+AgNPs	1.5	5	34	85	84.2105	34	85	84.2105	36	90	89.4737	38	95	94.7368	40	5
HI+AgNPs	1	1	32	80	78.9474	33	82.5	81.5789	35	87.5	86.8421	36	90	89.4737	40	5
HI+AgNPs	1	2	32	80	78.9474	33	82.5	81.5789	34	85	84.2105	35	87.5	86.8421	40	5
HI+AgNPs	1	3	32	80	78.9474	32	80	78.9474	33	82.5	81.5789	36	90	89.4737	40	5
HI+AgNPs	1	4	32	80	78.9474	32	80	78.9474	33	82.5	81.5789	35	87.5	86.8421	40	5
HI+AgNPs	1	5	31	77.5	76.3158	33	82.5	81.5789	34	85	84.2105	35	87.5	86.8421	40	5
HI+AgNPs	0.5	1	29	72.5	71.0526	30	75	73.6842	31	77.5	76.3158	33	82.5	81.5789	40	5
HI+AgNPs	0.5	2	29	72.5	71.0526	30	75	73.6842	31	77.5	76.3158	33	82.5	81.5789	40	5
HI+AgNPs	0.5	3	30	75	73.6842	30	75	73.6842	32	80	78.9474	34	85	84.2105	40	5
HI+AgNPs	0.5	4	30	75	73.6842	30	75	73.6842	32	80	78.9474	34	85	84.2105	40	5
HI+AgNPs	0.5	5	29	72.5	71.0526	30	75	73.6842	32	80	78.9474	33	82.5	81.5789	40	5
SS+EO	25	1	38	95	94.7368	38	95	94.7368	40	100	100	40	100	100	40	5
SS+EO	25	2	38	95	94.7368	38	95	94.7368	40	100	100	40	100	100	40	5
SS+EO	25	3	37	92.5	92.1053	38	95	94.7368	39	97.5	97.3684	40	100	100	40	5
SS+EO	25	4	37	92.5	92.1053	38	95	94.7368	39	97.5	97.3684	40	100	100	40	5
SS+EO	25	5	38	95	94.7368	38	95	94.7368	38	95	94.7368	40	100	100	40	5
SS+EO	20	1	35	87.5	86.8421	35	87.5	86.8421	37	92.5	92.1053	38	95	94.7368	40	5
SS+EO	20	2	34	85	84.2105	36	90	89.4737	36	90	89.4737	38	95	94.7368	40	5
SS+EO	20	3	35	87.5	86.8421	35	87.5	86.8421	37	92.5	92.1053	39	97.5	97.3684	40	5
SS+EO	20	4	36	90	89.4737	36	90	89.4737	36	90	89.4737	39	97.5	97.3684	40	5
SS+EO	20	5	34	85	84.2105	35	87.5	86.8421	37	92.5	92.1053	38	95	94.7368	40	5
SS+EO	15	1	33	82.5	81.5789	33	82.5	81.5789	34	85	84.2105	36	90	89.4737	40	5
SS+EO	15	2	32	80	78.9474	33	82.5	81.5789	35	87.5	86.8421	36	90	89.4737	40	5
SS+EO	15	3	32	80	78.9474	34	85	84.2105	34	85	84.2105	36	90	89.4737	40	5
SS+EO	15	4	32	80	78.9474	34	85	84.2105	34	85	84.2105	36	90	89.4737	40	5
SS+EO	15	5	33	82.5	81.5789	33	82.5	81.5789	35	87.5	86.8421	35	87.5	86.8421	40	5
SS+EO	10	1	30	75	73.6842	30	75	73.6842	32	80	78.9474	33	82.5	81.5789	40	5
SS+EO	10	2	29	72.5	71.0526	30	75	73.6842	33	82.5	81.5789	35	87.5	86.8421	40	5
SS+EO	10	3	30	75	73.6842	30	75	73.6842	32	80	78.9474	34	85	84.2105	40	5
SS+EO	10	4	30	75	73.6842	30	75	73.6842	32	80	78.9474	34	85	84.2105	40	5
SS+EO	10	5	28	70	68.4211	30	75	73.6842	32	80	78.9474	34	85	84.2105	40	5
